# Supplementary material
Source: PubMed Central journal article supplement (PMC3824990)
Supplement: 11357_2013_9511_MOESM1_ESM.pdf [file 11357_2013_9511_MOESM1_ESM.pdf]

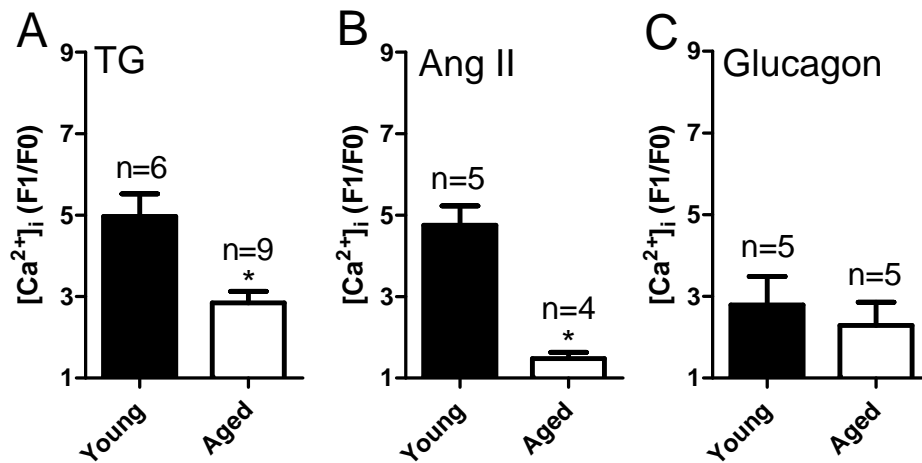

**Supplementary Figure 1.** Agonist-evoked  $Ca^{2+}$  release in primary cultured young and aged glomerular mesangial cells in  $Ca^{2+}$ -free saline solution. Summary of data showing 4  $\mu$ M thapsigargin (TG, A), 1  $\mu$ M angiotensin II (Ang II, B) or 10 nM glucagon (C)-evoked  $[Ca^{2+}]_i$  rise in young and aged mesangial cells in  $Ca^{2+}$ -free saline solution. Mean  $\pm$  SE. \* $P < 0.05$ . Young (3 months), n=5-6 vs aged (22 months), n=4-9.

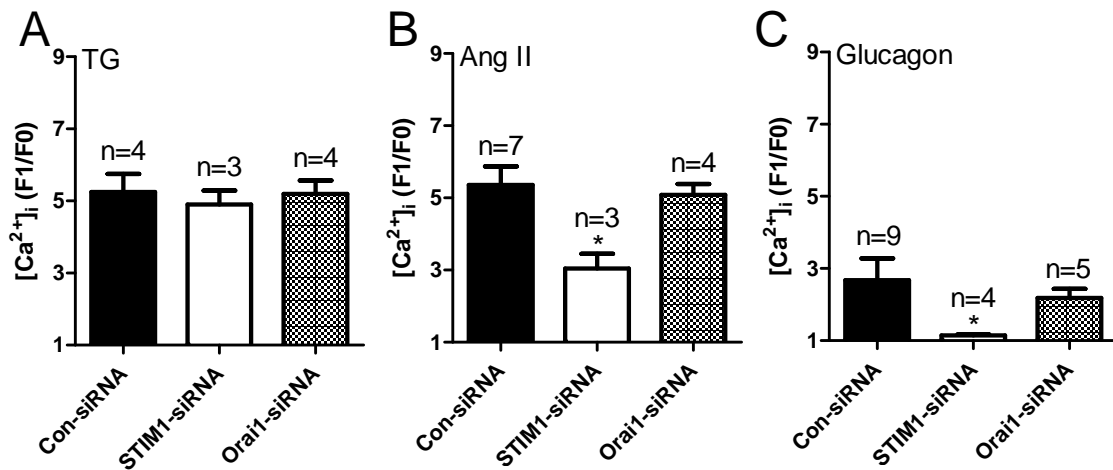

**Supplementary Figure 2.** The effect of STIM 1 and Orai 1 siRNA on agonist-evoked Ca<sup>2+</sup> release in primary cultured young glomerular mesangial cells in Ca<sup>2+</sup>-free saline solution. Summary of data showing 4 μM thapsigargin (TG, A), 1 μM angiotensin II (Ang II, B) or 10 nM glucagon (C)-evoked [Ca<sup>2+</sup>]<sub>i</sub> rise in young mesangial cells transfected with scramble-siRNA control (Con-siRNA), Orai 1 or STIM 1 siRNA in Ca<sup>2+</sup>-free saline solution. Mean ± SE. \*P<0.05 compared to mesangial cells transfected with scramble-siRNA control. n=3-9.
